# Supplementary material
Source: PubMed Central journal article supplement (PMC9165561)
Supplement: NEJMc2202879_disclosures.pdf [file NEJMc2202879_disclosures.pdf]

**Disclosure Purpose:** 22-02879

## Summary of Interests

I do not have any interests to disclose at this time.

## Additional Questions:

- Are there other relationships or activities that readers could perceive to have influenced, or that give the appearance of potentially influencing, what you wrote in the submitted work?**  
No.
- What is the manuscript title?**  
Omicron (BA.1/1.1) SARS-CoV-2 Infection among Vaccinated Canadian Adults
- Are you the corresponding author?**  
No.

## Certification

I certify that the information provided in this disclosure is complete and accurate.

Disclosure Purpose: 22-02879

Summary of Interests

**Company or Organization**

| Entity                                                        | Type       | Interest Held By                           |
|---------------------------------------------------------------|------------|--------------------------------------------|
| BlueDot                                                       | Consultant | Self                                       |
| <i>Category:</i> Consultant<br><i>Additional Information:</i> |            | <i>Description:</i> Consultant             |
| NHL Players' Association                                      | Consultant | Self                                       |
| <i>Category:</i> Consultant<br><i>Additional Information:</i> |            | <i>Description:</i> COVID safety protocols |

Additional Questions:

- Are there other relationships or activities that readers could perceive to have influenced, or that give the appearance of potentially influencing, what you wrote in the submitted work?**  
No.
- What is the manuscript title?**  
Omicron (BA.1/1.1) SARS-CoV-2 Infection among Vaccinated Canadian Adults
- Are you the corresponding author?**  
No.

Certification

I certify that the information provided in this disclosure is complete and accurate.

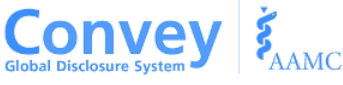

**Disclosure Purpose:** 22-02879

Summary of Interests

I do not have any interests to disclose at this time.

Additional Questions:

- 1. **Are there other relationships or activities that readers could perceive to have influenced, or that give the appearance of potentially influencing, what you wrote in the submitted work?**  
No.
- 2. **What is the manuscript title?**  
Omicron (BA.1/1.1) SARS-CoV-2 Infection among Vaccinated Canadian Adults
- 3. **Are you the corresponding author?**  
No.

Certification

I certify that the information provided in this disclosure is complete and accurate.

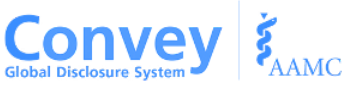

**Disclosure Purpose:** 22-02879

**Summary of Interests**

I do not have any interests to disclose at this time.

**Additional Questions:**

- 1. **Are there other relationships or activities that readers could perceive to have influenced, or that give the appearance of potentially influencing, what you wrote in the submitted work?**  
No.
- 2. **What is the manuscript title?**  
Omicron (BA.1/1.1) SARS-CoV-2 Infection among Vaccinated Canadian Adults
- 3. **Are you the corresponding author?**  
No.

**Certification**

I certify that the information provided in this disclosure is complete and accurate.

**Disclosure Purpose:** 22-02879

### Summary of Interests

I do not have any interests to disclose at this time.

### Additional Questions:

- Are there other relationships or activities that readers could perceive to have influenced, or that give the appearance of potentially influencing, what you wrote in the submitted work?**  
No.
- What is the manuscript title?**  
Omicron (BA.1/1.1) SARS-CoV-2 Infection among Vaccinated Canadian Adults
- Are you the corresponding author?**  
No.

### Certification

I certify that the information provided in this disclosure is complete and accurate.

**Disclosure Purpose:** 22-02879

## Summary of Interests

I do not have any interests to disclose at this time.

## Additional Questions:

- Are there other relationships or activities that readers could perceive to have influenced, or that give the appearance of potentially influencing, what you wrote in the submitted work?**  
No.
- What is the manuscript title?**  
Omicron (BA.1/1.1) SARS-CoV-2 Infection among Vaccinated Canadian Adults
- Are you the corresponding author?**  
No.

## Certification

I certify that the information provided in this disclosure is complete and accurate.

**Disclosure Purpose:** 22-02879

**Summary of Interests**

I do not have any interests to disclose at this time.

**Additional Questions:**

- 1. **Are there other relationships or activities that readers could perceive to have influenced, or that give the appearance of potentially influencing, what you wrote in the submitted work?**  
No.
- 2. **What is the manuscript title?**  
Omicron (BA.1/1.1) SARS-CoV-2 Infection among Vaccinated Canadian Adults
- 3. **Are you the corresponding author?**  
No.

**Certification**

I certify that the information provided in this disclosure is complete and accurate.

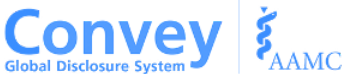

**Disclosure Purpose:** 22-02879

## Summary of Interests

| Company or Organization                                                                                                                                                                |                  |                                                                                                                  |
|----------------------------------------------------------------------------------------------------------------------------------------------------------------------------------------|------------------|------------------------------------------------------------------------------------------------------------------|
| Entity                                                                                                                                                                                 | Type             | Interest Held By                                                                                                 |
| <a href="#">Providence Therapeutics</a>                                                                                                                                                | Grant / Contract | Self                                                                                                             |
| <i>Recipient Name:</i> Anne-Claude Gingras<br><i>Grant / Contract Description:</i> Our team has helped (based on service-contract) to analyze antibody levels in preclinical and phase |                  | <i>Recipient Type:</i> Individual<br><i>Grant / Contract Purpose:</i> Research<br><i>Additional Information:</i> |

## Additional Questions:

- Are there other relationships or activities that readers could perceive to have influenced, or that give the appearance of potentially influencing, what you wrote in the submitted work?**  
No.
- What is the manuscript title?**  
Omicron (BA.1/1.1) SARS-CoV-2 Infection among Vaccinated Canadian Adults
- Are you the corresponding author?**  
No.

## Certification

I certify that the information provided in this disclosure is complete and accurate.



**Disclosure Purpose:** 22-02879

### Summary of Interests

I do not have any interests to disclose at this time.

### Additional Questions:

1. **Are there other relationships or activities that readers could perceive to have influenced, or that give the appearance of potentially influencing, what you wrote in the submitted work?**

No.

2. **What is the manuscript title?**

Omicron (BA.1/1.1) SARS-CoV-2 Infection among Vaccinated Canadian Adults

3. **Are you the corresponding author?**

Yes.

a. **Please list the other authors' names here.**

Patrick E. Brown, Ph.D. Sze Hang Fu, M.S.A. Aiyush Bansal, M.D. Leslie Newcombe, B.Sc. Karen Colwill, Ph.D. Geneviève Mailhot, M.Sc. Melanie Delgado-Brand, B.Sc. Anne-Claude Gingras, Ph.D., Arthur S. Slutsky, M.D. Maria Pasic, Ph.D. Jeffrey Companion Isaac I. Bogoch, M.D. Ed Morawski, M.A. Teresa Lam, B.A. Angus Reid, Ph.D.

### Certification

I certify that the information provided in this disclosure is complete and accurate.

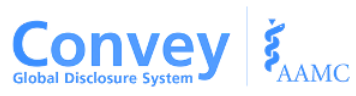

**Disclosure Purpose:** 22-02879

Summary of Interests

I do not have any interests to disclose at this time.

Additional Questions:

- 1. **Are there other relationships or activities that readers could perceive to have influenced, or that give the appearance of potentially influencing, what you wrote in the submitted work?**  
No.
- 2. **What is the manuscript title?**  
Omicron (BA.1/1.1) SARS-CoV-2 Infection among Vaccinated Canadian Adults
- 3. **Are you the corresponding author?**  
No.

Certification

I certify that the information provided in this disclosure is complete and accurate.

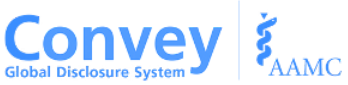

**Disclosure Purpose:** 22-02879

### Summary of Interests

I do not have any interests to disclose at this time.

### Additional Questions:

- Are there other relationships or activities that readers could perceive to have influenced, or that give the appearance of potentially influencing, what you wrote in the submitted work?**  
No.
- What is the manuscript title?**  
Omicron (BA.1/1.1) SARS-CoV-2 Infection among Vaccinated Canadian Adults
- Are you the corresponding author?**  
No.

### Certification

I certify that the information provided in this disclosure is complete and accurate.

**Disclosure Purpose:** 22-02879

## Summary of Interests

I do not have any interests to disclose at this time.

## Additional Questions:

- Are there other relationships or activities that readers could perceive to have influenced, or that give the appearance of potentially influencing, what you wrote in the submitted work?**  
No.
- What is the manuscript title?**  
Omicron (BA.1/1.1) SARS-CoV-2 Infection among Vaccinated Canadian Adults
- Are you the corresponding author?**  
No.

## Certification

I certify that the information provided in this disclosure is complete and accurate.

**Disclosure Purpose:** 22-02879

### Summary of Interests

I do not have any interests to disclose at this time.

### Additional Questions:

- Are there other relationships or activities that readers could perceive to have influenced, or that give the appearance of potentially influencing, what you wrote in the submitted work?**  
No.
- What is the manuscript title?**  
Omicron (BA.1/1.1) SARS-CoV-2 Infection among Vaccinated Canadian Adults
- Are you the corresponding author?**  
No.

### Certification

I certify that the information provided in this disclosure is complete and accurate.

**Disclosure Purpose:** 22-02879

Summary of Interests

I do not have any interests to disclose at this time.

Additional Questions:

- 1. **Are there other relationships or activities that readers could perceive to have influenced, or that give the appearance of potentially influencing, what you wrote in the submitted work?**  
No.
- 2. **What is the manuscript title?**  
Omicron (BA.1/1.1) SARS-CoV-2 Infection among Vaccinated Canadian Adults
- 3. **Are you the corresponding author?**  
No.

Certification

I certify that the information provided in this disclosure is complete and accurate.

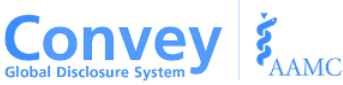

**Disclosure Purpose:** 22-02879

### Summary of Interests

I do not have any interests to disclose at this time.

### Additional Questions:

- Are there other relationships or activities that readers could perceive to have influenced, or that give the appearance of potentially influencing, what you wrote in the submitted work?**  
No.
- What is the manuscript title?**  
Omicron (BA.1/1.1) SARS-CoV-2 Infection among Vaccinated Canadian Adults
- Are you the corresponding author?**  
No.

### Certification

I certify that the information provided in this disclosure is complete and accurate.

**Disclosure Purpose:** 22-02879

## Summary of Interests

| Entity                                                                        | Type                       | Interest Held By                                    |
|-------------------------------------------------------------------------------|----------------------------|-----------------------------------------------------|
| <a href="#">Altimmune</a>                                                     | Consultant                 | Self                                                |
| <i>Category:</i> Consultant<br><i>Additional Information:</i>                 |                            | <i>Description:</i> Consultant re drug for COVID-19 |
| <a href="#">Cellenkos</a>                                                     | Consultant                 | Self                                                |
| <i>Category:</i> Consultant<br><i>Additional Information:</i>                 |                            | <i>Description:</i>                                 |
| <a href="#">Diffusion Pharmaceuticals</a>                                     | Consultant                 | Self                                                |
| <i>Category:</i> Consultant<br><i>Additional Information:</i>                 |                            | <i>Description:</i> Consultant re drug for COVID-19 |
| <a href="#">Faron</a>                                                         | Data And Safety Monitoring | Self                                                |
| <i>Category:</i> Data And Safety Monitoring<br><i>Additional Information:</i> |                            | <i>Description:</i>                                 |
| <a href="#">GlaxoSmithKline</a>                                               | Consultant                 | Self                                                |
| <i>Category:</i> Consultant<br><i>Additional Information:</i>                 |                            | <i>Description:</i> Consultant re drug for COVID-19 |

## Additional Questions:

- Are there other relationships or activities that readers could perceive to have influenced, or that give the appearance of potentially influencing, what you wrote in the submitted work?**  
No.
- What is the manuscript title?**  
Omicron (BA.1/1.1) SARS-CoV-2 Infection among Vaccinated Canadian Adults
- Are you the corresponding author?**  
No.

## Certification

I certify that the information provided in this disclosure is complete and accurate.
